# Supplementary material for: Rosmarinic acid alleviated intestinal barrier damage caused by Escherichia coli by regulating the gut microbiota and inhibiting the NF-κB signalling pathway in mice
Source: Royal Society of Chemistry journal article supplement (doi:10.1039/d4fo02654c), 2024-01-01
Supplement: d4fo02654c1.pdf [file d4fo02654c1.pdf]

## Supplementary materials

Table 1. Specific primers for real-time PCR

| target gene                     | Forward (5'-3')           | Reverse (5'-3')            |
|---------------------------------|---------------------------|----------------------------|
| <b>TNF-<math>\alpha</math></b>  | F: CGCTGAGGTCAATCTGC      | R: GGCTGGGTAGAGAATGGA      |
| <b>IL-6</b>                     | F: ACAGAAGGAGTGGCTAAGGA   | R: AGGCATAACGCACTAGGTTT    |
| <b>ZO-1</b>                     | F: GCTTTAGCGAACAGAAGGAGC  | R: TTCATTTTCCGAGACTTCACCA  |
| <b>Occludin</b>                 | F: TGAAAGTCCACCTCCTTACAGA | R: CCGGATAAAAAAGAGTACGCTGG |
| <b>Claudin-1</b>                | F: TGCCCCAGTGGAAAGATTTACT | R: CTTTGCGAAACGCAGGACAT    |
| <b><math>\beta</math>-actin</b> | F: CCTCACTGTCCACCTCC      | R: GGGTGTA AAAACGCAGCTC    |

Table 2 The minimum inhibitory concentration of RA against *E. coli*

| drug                  | 4.00 | 2.00 | 1.00 | 0.500 | 0.250 | 0.125 | 0.0625 | 0.0313 | 0.0157 | 0.00785 | Positive control | negative control |
|-----------------------|------|------|------|-------|-------|-------|--------|--------|--------|---------|------------------|------------------|
| concentration (mg/mL) |      |      |      |       |       |       |        |        |        |         |                  |                  |
| 1                     | -    | -    | +    | +     | +     | +     | +      | +      | +      | +       | +                | -                |
| 2                     | -    | -    | +    | +     | +     | +     | +      | +      | +      | +       | +                | -                |
| 3                     | -    | -    | +    | +     | +     | +     | +      | +      | +      | +       | +                | -                |

+ represents positive, indicating the presence of bacterial precipitation, - represents negative, and no bacterial precipitation appears.

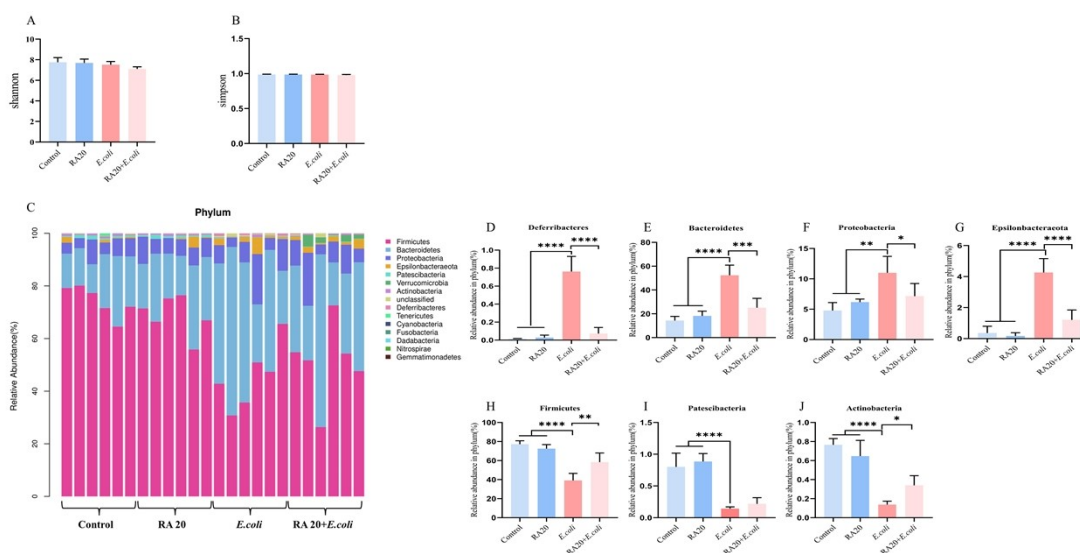

Supplementary Figure 1 RA maintained dysbiosis of the bacterial community caused by *E. coli*. (A) Alpha diversity analysis- shannon (n = 6); (B) Alpha diversity analysis-simpson (n = 6); (C) Relative abundance of the gut microbiota at the Phylum level (n = 6); (D) the relative abundance of p\_\_*Deferribacteres* (n = 3); (E) the relative abundance of p\_\_*Bacteroidetes* (n = 3); (F) the relative abundance of p\_\_*Proteobacterin* (n = 3); (G) the relative abundance of p\_\_*Epsilonbacteraeota* (n = 3); (H) the relative abundance of p\_\_*Firmicutes* (n = 3); (I) the relative

abundance of p\_\_*Patiscibacteria* (n = 3); (J)the relative abundance of p\_\_*Actinobacteria* (n = 3).

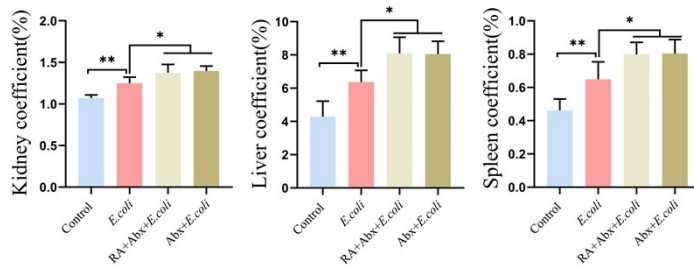

Supplementary Figure 2 Measurement of organ coefficient. (A) Mice liver coefficient (n = 6); (B) Mice kidney coefficient (n = 6); (C) Mice spleen coefficient (n = 6).

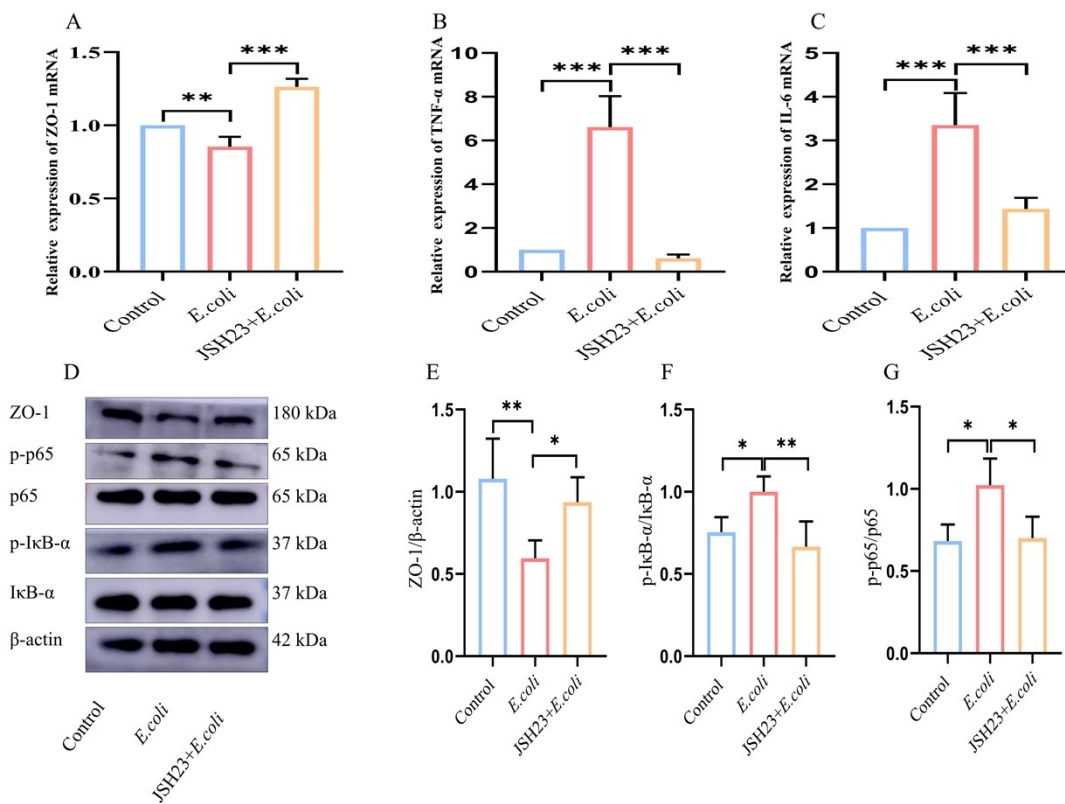

Supplementary Figure 3 RA reduced inflammation caused by *E. coli* by inhibiting the NF-κB signaling pathway to restore ZO-1 expression. (A) The mRNA expression of ZO-1 (n = 6) ;(B) The mRNA expression of TNF-α (n = 6); (C) The mRNA expression of IL-6 (n = 6); (D-G) Expression of protein of ZO-1, p65, p-p65, IκB-α and p-IκB-α (n = 3).
